# Supplementary material for: Metal–ligand cooperative approaches in homogeneous catalysis using transition metal complex catalysts of redox noninnocent ligands
Source: Royal Society of Chemistry journal article supplement (doi:10.1039/d1ob01153g), 2021-12-06
Supplement: d1ob01153g1.pdf [file d1ob01153g1.pdf]

## Supplementary Information

# **Metal-Ligand Cooperative Approaches in Homogeneous Catalysis Using Transition Metal Complex Catalysts of Redox Noninnocent Ligands**

Rakesh Mondal, Amit Kumar Guin, Gargi Chakraborty and Nanda D. Paul\*

Department of Chemistry, Indian Institute of Engineering Science and Technology, Shibpur

Botanic Garden, Howrah 711103, India

## Abbreviation List

abt = aromatic monoanionic *o*-aminothiophenolate.

PI = iminopyridine.

PDI = bis(imino)pyridine.

THF = tetrahydrofuran.

Fc/Fc<sup>+</sup> = Ferrocene/ Ferrocenium

Cp<sub>2</sub>Fe = iron(II) bis(cyclopentadienide).

TON = Turn over number.

HAT = Hydrogen atom transfer.

GO = Galactose Oxidase

TOF = Turn over frequency.

BQ = benzoquinone.

SQ<sup>•-</sup> = semiquinonate.

DFT = Density Functional Theory.

pcp = 2-(4-chlorophenylazo)pyridine.

bpy = 2,2'-bipyridine.

acac<sup>-</sup> = acetylacetonate.

DTBCat<sup>2-</sup> = 3,5-di-tert-butyl catecholate.

SET-WNA = Single electron transfer-water nucleophilic attack.

2c-3e = 2-centers-3 electrons.

SET = Single electron transfer

SCE = Saturated calomel electrode.

PCET = Proton-coupled electron transfer.

bdt = benzenedithiolate.

tdt = toluene-3,4-dithiol.

dcbdt = 3,6-dichloro-1,2-benzenedithiol.

tpy = 2,2':6',2''-terpyridine.

CPE = Controlled-potential electrolysis.

TBP = 2,6-di-<sup>t</sup>Bu-pyridine.

MCS = Multi-component stream.
